# Supplementary material for: Public’s calorie literacy and perceived effectiveness of restaurant menu calorie labeling in the United Arab Emirates
Source: PubMed Central journal article supplement (PMC10597515; doi:10.1371/journal.pone.0293387), 2023-10-24
Supplement: pone.0293387.s001.pdf [file pone.0293387.s001.pdf]

## Demographics

1. **What is your gender?**
  - Female
  - Male
2. **What is your nationality?**
  - Local citizen
  - Resident Expatriate
  - Non-resident
3. **Which Emirate do you reside in?**
  - Abu Dhabi
  - Dubai
  - Sharjah
  - Northern Emirates (Ajman, Umm AL Quwain, Ras Al Khaimah, Fujairah)
4. **Which age group do you belong to?**
  - 18-30
  - 31-45
  - 46-65
  - 65+
5. **What is your marital status?**
  - Married
  - Single
  - Other
6. **What is your employment status?**
  - Employed
  - Retired
  - Other (e.g., homemaker, student)
7. **What is your household income?**
  - Less than 10,000 AED/MONTH
  - 10,000 to 20,000 AED/MONTH
  - 20,000 to 30,000 AED/MONTH
  - MORE THAN 30,000 AED/MONTH
  - I prefer not to tell
8. **What is your education Level?**
  - Less than high school
  - High school diploma
  - More than high school
9. **What is your weight?** \_\_\_\_\_ (kg)
10. **What is your height?** \_\_\_\_\_ (cm)

### Recommended energy requirements and calorie knowledge

11. What does the term “Calories in food” mean to you?

- The amount of energy the food gives
- The amount of energy I burn when I eat this food
- It is related to fat
- I don't know

12. What is the average daily caloric requirement for adults?

- <1500 kcal
- 1500 – 1900 kcal
- 2000 - 2500 kcal
- > 2700 kcal
- I do not know

### Consumer dining practice

13. How many times a week do you eat outside?

- None
- 1-2
- 3-4
- 5+

14. Do you get meals from the following food outlets? (Tick all that apply)

- Fast food
- Coffee shop
- Dine-in restaurant
- Cafeteria
- take-away from supermarket store
- Food truck / food stand / ‘street food’
- Sports and recreation venues (Eg – stadium)
- Entertainment venue (eg – Theatres)
- Delivery Apps (Like Zomato, Talabat etc.)
- Vending machines
- I don't eat from outside

15. Which of the following factors influence your purchase at food outlets the most?

- Calories and their impact over health
- Price of meal
- Mood/Cravings

### Self-perceived caloric knowledge and Usefulness of calorie posting

16. Do you feel that you know enough about your daily calorie requirements to make healthier food choices in restaurants?

- Yes, I know enough
- No, I do not know enough, but I would like to know more.
- It doesn't matter to me

17. Would the number of calories in foods and drinks influence your choice?

- Yes
- No

**Perceptions of posting caloric information in chain restaurants**

**18. Would you be more or less likely to eat at restaurants if they reported calorie information on menus/menu boards/online for each food item? \***

- More likely
- Less likely
- Neutral

**19. Would you trust that the calorie information on menus is correct?**

- Yes
- No
- I don't know

**Consumer preferences on calorie posting on menus**

**20. Would you like to see calorie information on menus?**

- Yes
- No
- I don't care about calories

**21. In addition to calories, would you like to see other nutritional information on menus? \***

- Yes
- No
- I don't know

**22. if Yes, please tick the nutritional information you would like to see on menus. \***

- Total Sugars
- Total fat
- Saturated fat
- Unsaturated fat
- Trans fat
- Sodium
- Dietary Fibers
- Carbohydrates
- Protein
- Vitamins/Minerals
- Allergen information
